# Supplementary material for: Socioeconomic Health Equity with Malaria Burden: Quantifying Slope (Relative) Index of Inequity in Malaria Infection Outcomes in the Southeastern-coastal Tanzania
Source: Research Square preprint supplement (doi:10.21203/rs.3.rs-7854639/v1), 2025-11-03
Supplement: Supplementary file 1 [file ca9a276a3f9ed6369e9867c7.pdf]

## Appendix:

### Appendix 1: Weighting system for socioeconomic score by primary component analysis.

| Measurement of Socioeconomic Status (Variables) | Mean  | Standard<br>Deviation | Factor Score<br>(Weigh) | SES Score<br>(Factor<br>Score*100) | More-than-one<br>Options |
|-------------------------------------------------|-------|-----------------------|-------------------------|------------------------------------|--------------------------|
| <b>Household Infrastructure</b>                 |       |                       |                         |                                    |                          |
| Number of bedrooms                              | 2.321 | 0.94                  | 0.124                   | 12.415                             |                          |
| Number of windows                               | 2.551 | 2.278                 | 0.252                   | 25.16                              |                          |
| Number of doors                                 | 1.722 | 0.47                  | 0.14                    | 14.034                             |                          |
| House covered with ceiling                      | 0.041 | 0.199                 | 0.143                   | 14.285                             |                          |
| House with crack openings                       | 0.881 | 0.324                 | -0.133                  | -13.253                            |                          |
| House equipped with mosquito net                | 0.917 | 0.275                 | 0.066                   | 6.596                              |                          |

|                                                                 |       |       |        |         |
|-----------------------------------------------------------------|-------|-------|--------|---------|
| House light supplied by electricity source                      | 0.812 | 0.391 | 0.113  | 11.293  |
| House light supplied by flame source                            | 0.127 | 0.333 | -0.087 | -8.663  |
| House with no light or supplied by other source                 | 0.091 | 0.287 | -0.071 | -7.093  |
| Wall material is brick                                          | 0.109 | 0.311 | 0.215  | 21.486  |
| Wall material is sticks and/or plaster                          | 0.305 | 0.46  | 0.077  | 7.66    |
| Wall material is mud or other                                   | 0.587 | 0.492 | -0.207 | -20.733 |
| Roof material is metal and/or tile                              | 0.539 | 0.498 | 0.253  | 25.314  |
| Roof material is plant piece (grass, leaves, branches) or other | 0.461 | 0.498 | -0.253 | -25.314 |

|                                          |       |       |        |         |
|------------------------------------------|-------|-------|--------|---------|
| Floor material is tile                   | 0.005 | 0.068 | 0.08   | 7.96    |
| Floor material is cement                 | 0.296 | 0.457 | 0.288  | 28.834  |
| Floor material is mat                    | 0.001 | 0.031 | -0.01  | -1.005  |
| Floor material is soil or other          | 0.698 | 0.459 | -0.298 | -29.791 |
| Private flush toilet                     | 0.083 | 0.218 | 0.191  | 19.057  |
| Shared flush toilet                      | 0.825 | 0.115 | 0.075  | 7.539   |
| Private pit latrine                      | 0.014 | 0.38  | -0.132 | -13.249 |
| Shared pit latrine                       | 0.05  | 0.276 | 0.019  | 1.94    |
| Bush or the toilet                       | 0.028 | 0.166 | -0.031 | -3.126  |
| Water supplied by private well/pump/pipe | 0.014 | 0.118 | 0.1    | 9.976   |

|                                                       |       |       |        |        |
|-------------------------------------------------------|-------|-------|--------|--------|
| Water supplied by public tank/well/pump/pipe/sellings | 0.817 | 0.387 | 0.055  | 5.48   |
| Water supplied by river/stream                        | 0.17  | 0.375 | -0.088 | -8.781 |

### Ownership and Property

---

|                                                      |       |       |        |          |
|------------------------------------------------------|-------|-------|--------|----------|
| Keep animal in household                             | 0.559 | 0.496 | -0.057 | -5.651   |
| Car transportation                                   | 0.004 | 0.063 | 0.058  | 5.797 *  |
| Motor transportation (motor bicycle, motor tricycle) | 0.16  | 0.367 | 0.103  | 10.348 * |
| Manual labor transportation (bicycle, boat, canoe)   | 0.452 | 0.498 | 0.044  | 4.445 *  |
| Animal labor transportation                          | 0.011 | 0.102 | 0.064  | 6.401 *  |
| No transportation method or other method             | 0.453 | 0.498 | -0.087 | -8.659 * |
| Own radio                                            | 0.385 | 0.487 | 0.122  | 12.159 * |
| Own mobile phone                                     | 0.882 | 0.322 | 0.107  | 10.73 *  |
| Own electric fan                                     | 0.02  | 0.139 | 0.14   | 14.049 * |
| Own TV                                               | 0.11  | 0.312 | 0.256  | 25.575 * |

|                               |       |       |        |         |   |
|-------------------------------|-------|-------|--------|---------|---|
| Own electric iron             | 0.022 | 0.147 | 0.177  | 17.66   | * |
| Own refrigerator              | 0.016 | 0.126 | 0.158  | 15.76   | * |
| Own satellite signal receiver | 0.062 | 0.241 | 0.224  | 22.393  | * |
| Own other valuable item       | 0.002 | 0.047 | 0.026  | 2.566   | * |
| Own no valuable item          | 0.09  | 0.286 | -0.113 | -11.284 | * |
|                               |       |       |        |         |   |
| Own the house                 | 0.126 | 0.332 | 0.077  | 7.659   |   |

### **Social Potential**

---

|                                                                                            |       |       |        |         |   |
|--------------------------------------------------------------------------------------------|-------|-------|--------|---------|---|
| Earn income by industries or commercial (skilled labor, driver, salary, business, pension) | 0.174 | 0.379 | 0.167  | 16.689  | * |
| Earn income by agriculture (fishing, farming, livestock keeping)                           | 0.829 | 0.377 | -0.129 | -12.939 | * |
| Earn income by other method or casual labor                                                | 0.025 | 0.156 | 0.012  | 1.213   | * |
| No income or receive donation                                                              | 0.035 | 0.183 | -0.012 | -1.153  | * |
|                                                                                            |       |       |        |         |   |
| Household highest education is university degree or higher                                 | 0.006 | 0.075 | 0.07   | 6.957   | * |
| Household highest education is secondary school to diploma                                 | 0.217 | 0.412 | 0.109  | 10.94   | * |

|                                               |       |       |        |          |
|-----------------------------------------------|-------|-------|--------|----------|
| Household highest education is primary school | 0.679 | 0.467 | -0.084 | -8.4 *   |
| Household highest education is no education   | 0.098 | 0.298 | -0.037 | -3.727 * |
| Hold insurance                                | 0.108 | 0.31  | 0.114  | 11.427 * |

---

**\*:Participant has more-than-one options among the category.**

**Proportion of variance: 12.56%.**

**Eigenvalue: 6.404**
